# Supplementary material
Source: publisher site journal article supplement (https://www.dovepress.com/article/386407)
Supplement: Supplementary file 1 [file get_supplementary_file.php]

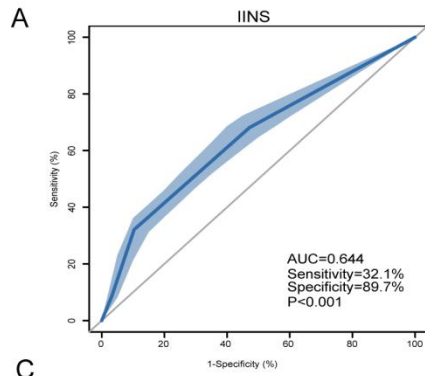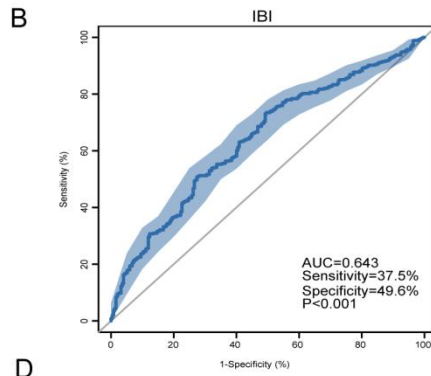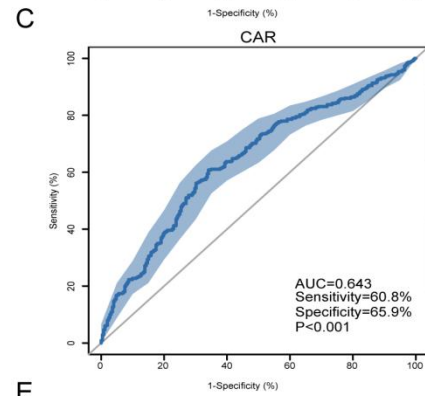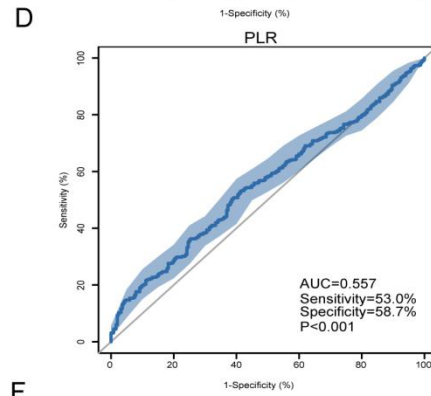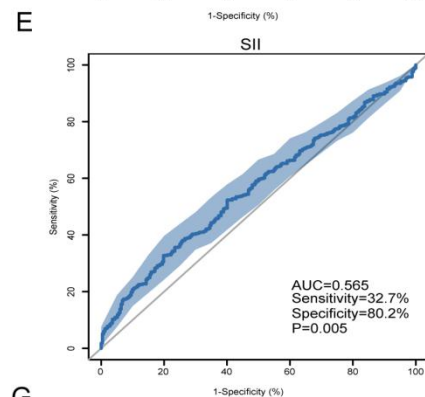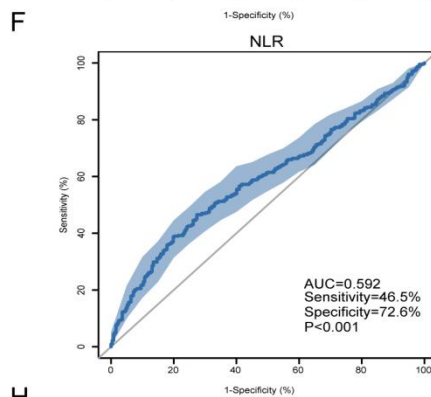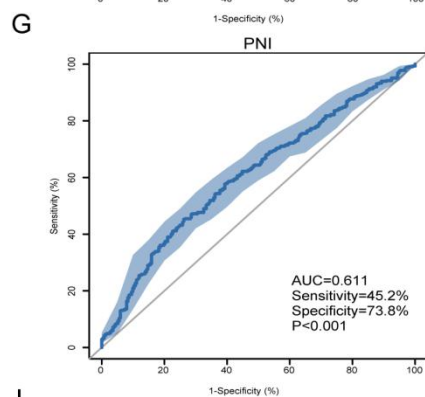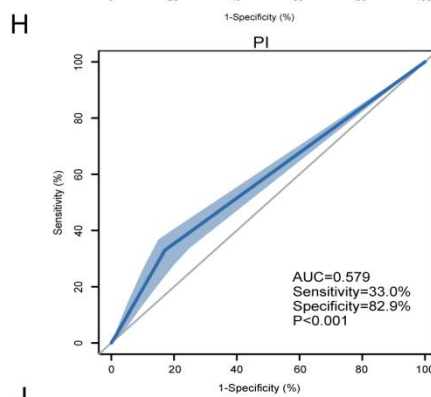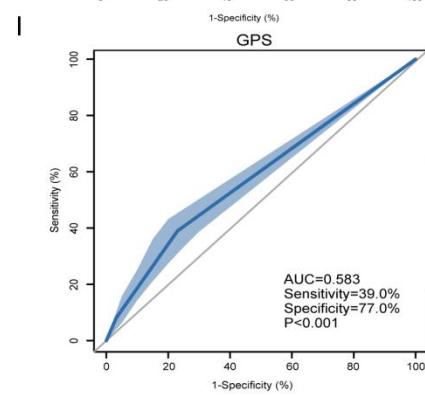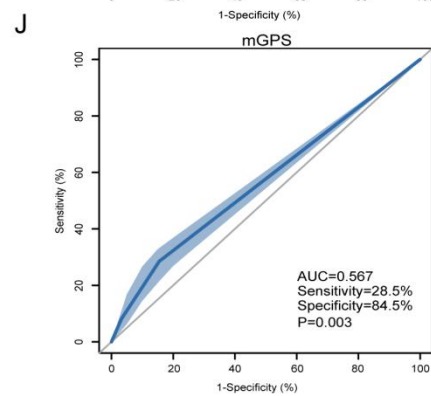

**Supplemental Figure 2** Receiver operating characteristic curves of following indices for disease-free survival in patients with hepatocellular carcinoma: **(A)** IINS, **(B)** IBI, **(C)** CAR, **(D)** PLR, **(E)** SII, **(F)** NLR, **(G)** PNI, **(H)** PI, **(I)** GPS, and **(J)** mGPS.

**Abbreviations:** IINS, Inflammation-immunity-nutrition score; IBI, Inflammatory burden index; CAR, C-reactive protein/albumin ratio; PLR, platelet-lymphocyte ratio; SII, systemic immune inflammation index; NLR, neutrophil-to-lymphocyte ratio; PNI, prognostic nutritional index; PI, prognostic index; GPS, Glasgow Prognostic Score; mGPS, modified Glasgow Prognostic Score; ROC, receiver operating characteristic curves; AUC, area under the curve; HCC, hepatocellular carcinoma; DFS, disease-free survival



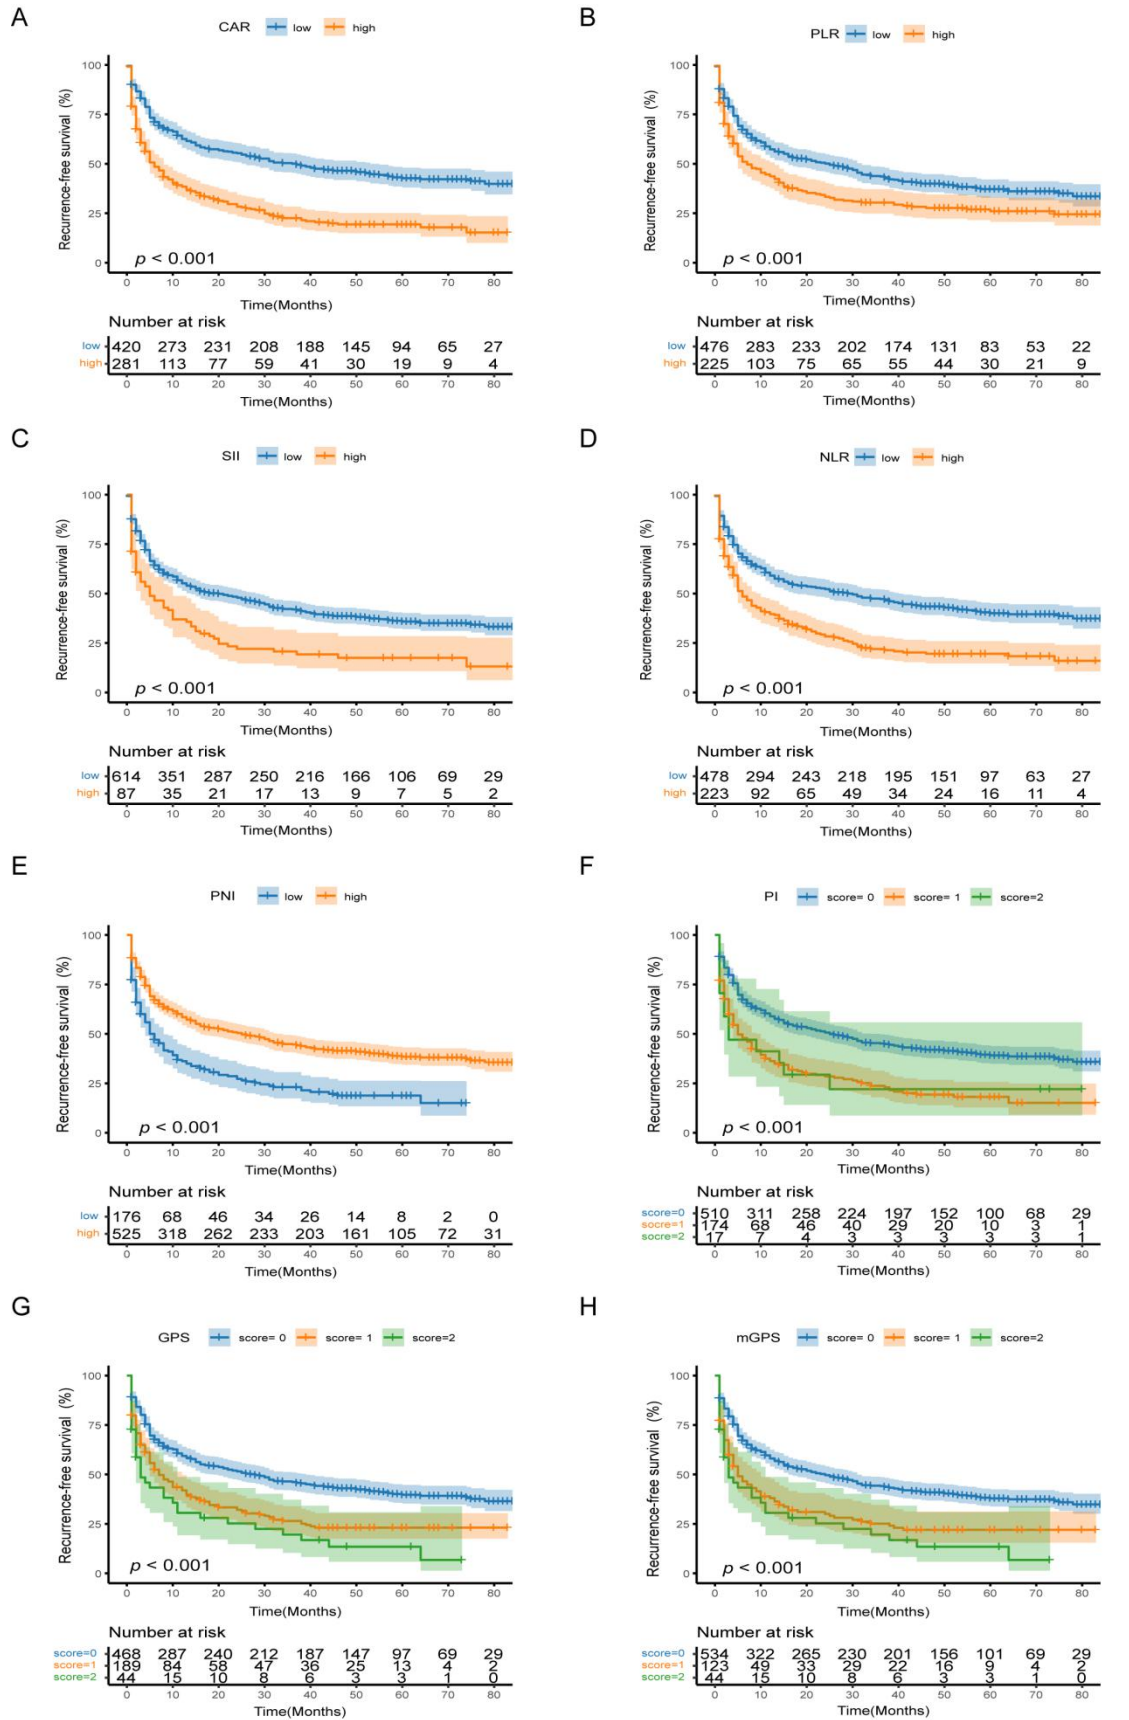

**Supplemental Figure 3** Kaplan–Meier DFS curves of (A) CAR, (B) PLR, (C) SII, (D) NLR,



**(E)** PNI, **(F)** PI, **(G)** GPS and **(H)** mGPS.

**Abbreviations:** CAR, C-reactive protein/albumin ratio; PLR, platelet- lymphocyte ratio; SII, systemic immune inflammation index; NLR, neutrophil-to-lymphocyte ratio; PNI, prognostic nutritional index; PI, prognostic index; GPS, Glasgow Prognostic Score; mGPS, modified Glasgow Prognostic Score; DFS, disease-free survival

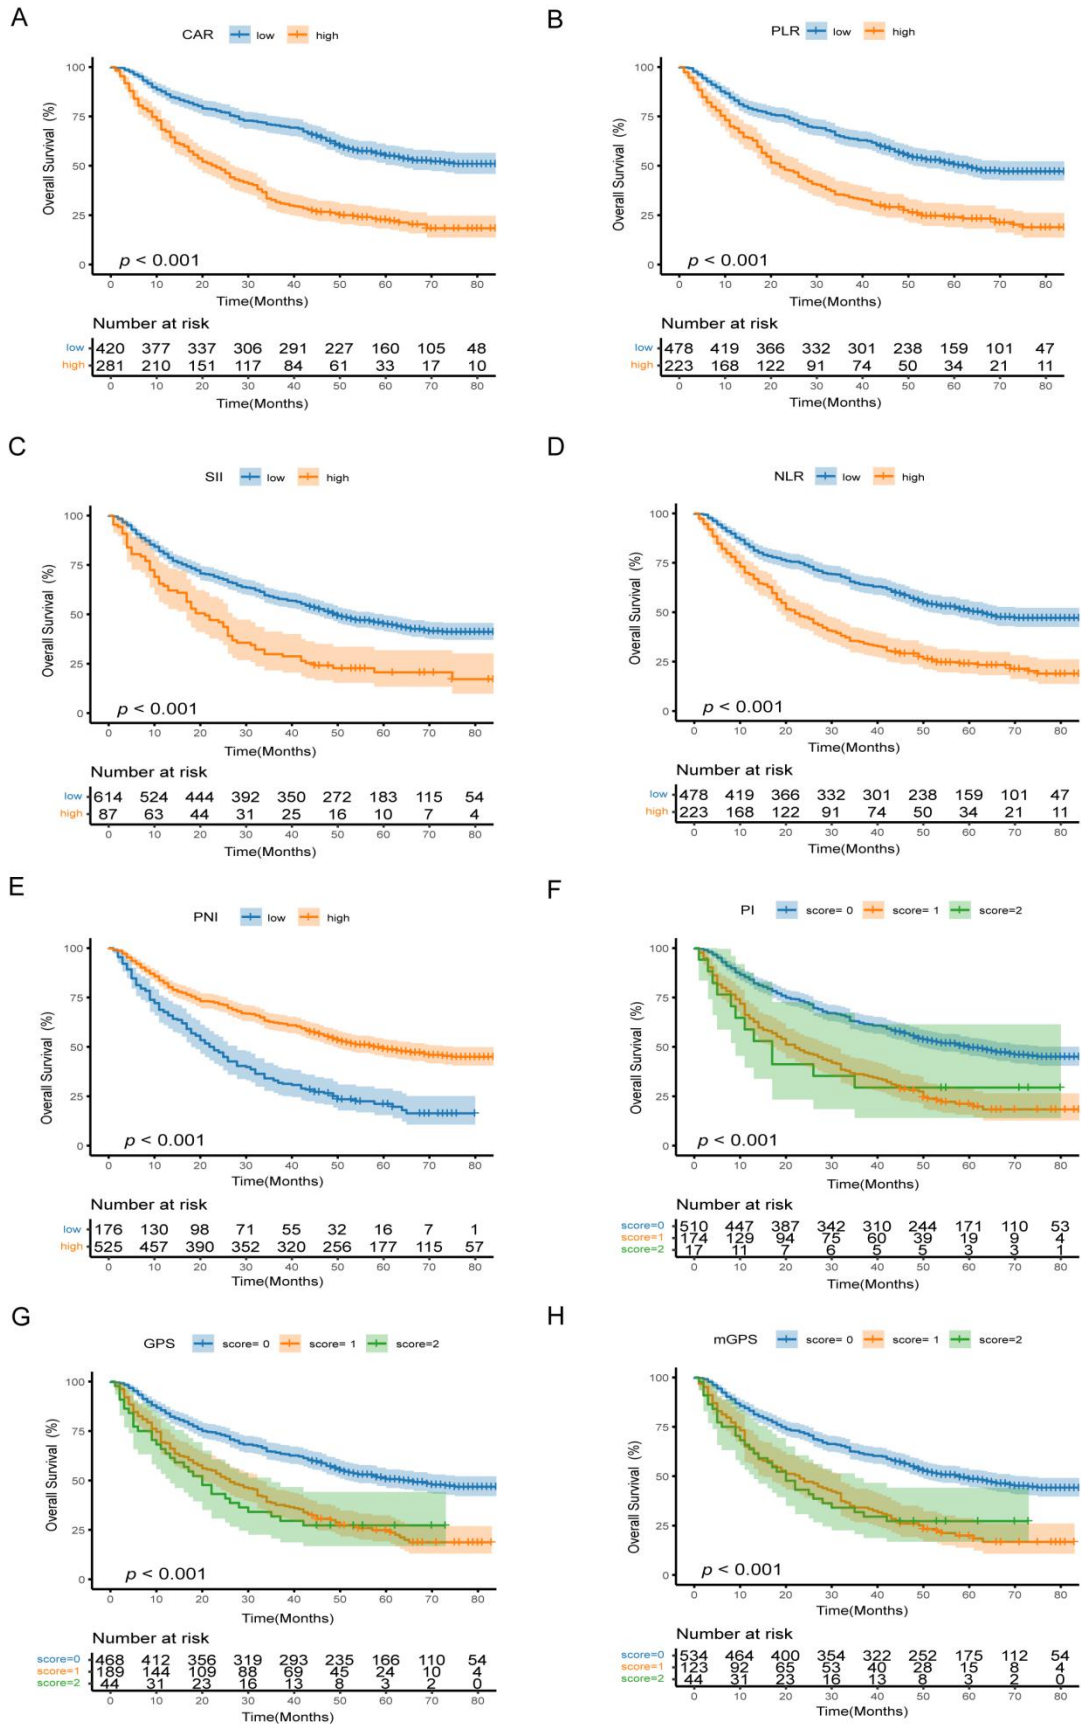

**Supplemental Figure 4** Kaplan–Meier OS curves of (A) CAR, (B) PLR, (C) SII, (D) NLR, (E) PNI, (F) PI, (G) GPS and (H) mGPS.

**Abbreviations:** CAR, C-reactive protein/albumin ratio; PLR, platelet- lymphocyte ratio; SII, systemic immune inflammation index; NLR, neutrophil-to-lymphocyte ratio; PNI, prognostic nutritional index; PI, prognostic index; GPS, Glasgow Prognostic Score; mGPS, modified Glasgow Prognostic Score; OS, overall survival

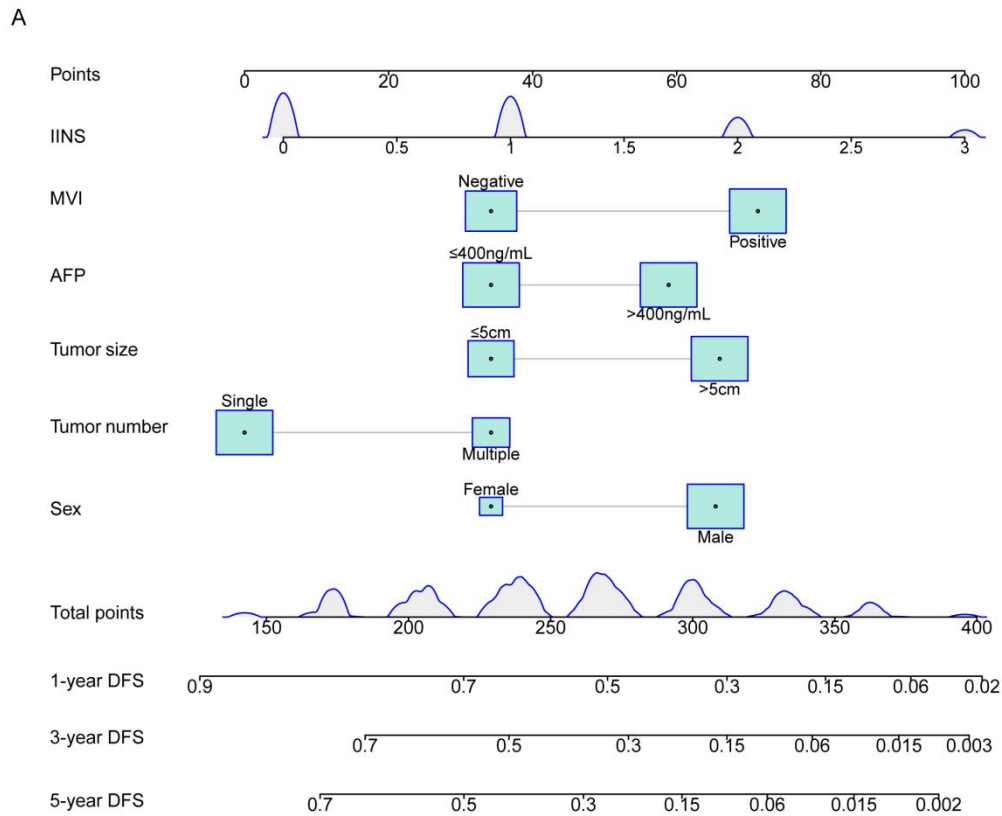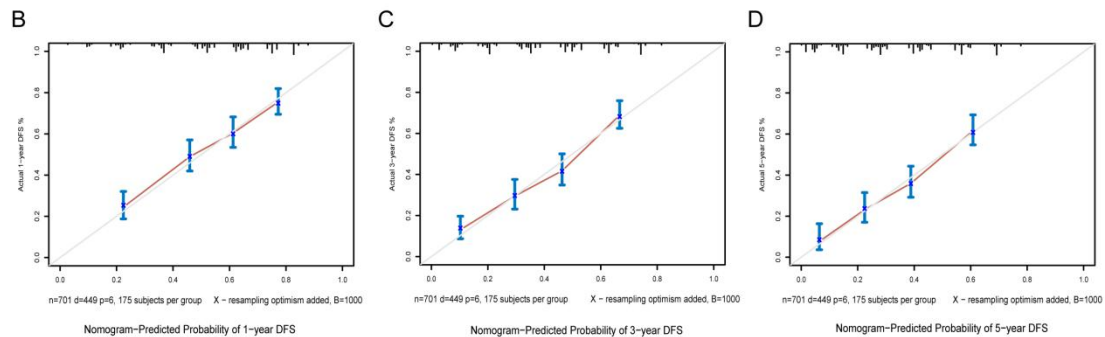

**Supplemental Figure 5** Model 1 for predicting DFS of HCC patients after hepatectomy. **(A)** Nomogram of the model. **(B-D)** Calibration curves for **(B)** 1 year, **(C)** 3 years and **(D)** 5 years DFS.

**Note:** Model 1, prognostic model based on IINS

**Abbreviations:** IINS, Inflammation-immunity-nutrition score; MVI, microvascular invasion; AFP, alpha-fetoprotein; BCLC, Barcelona Clinic Liver Cancer, DFS, disease-free survival

A

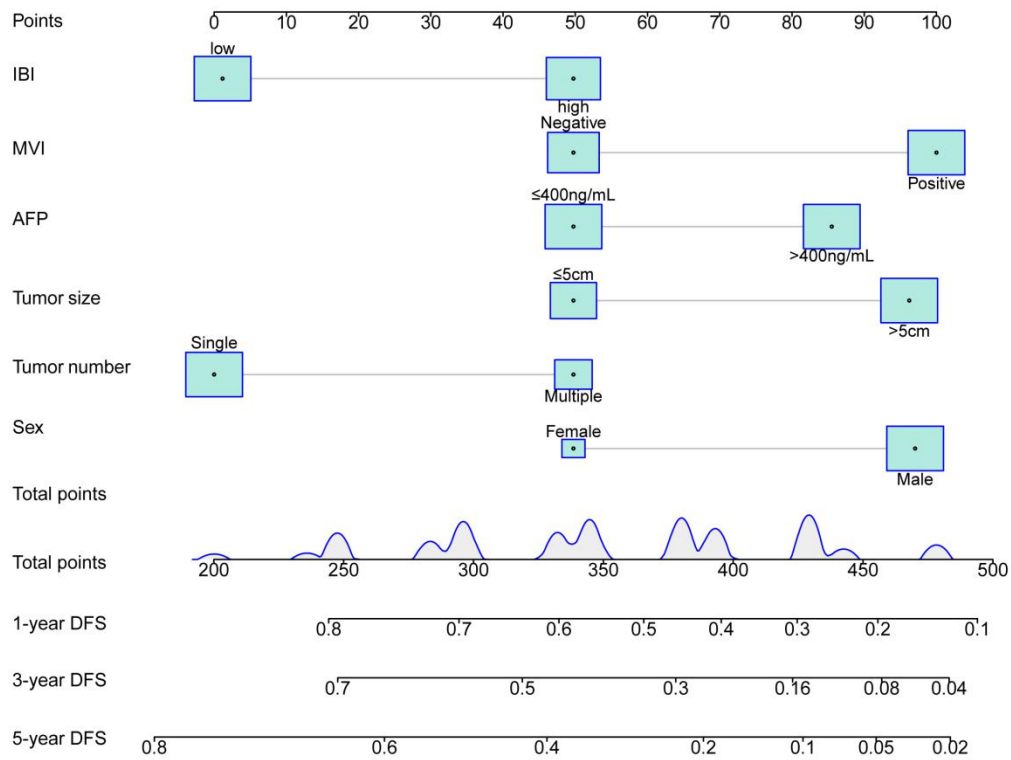

B

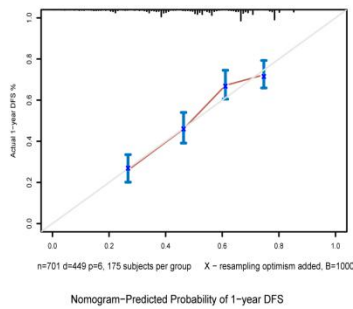

C

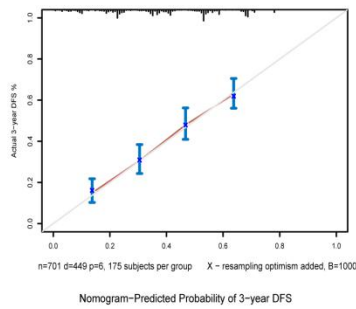

D

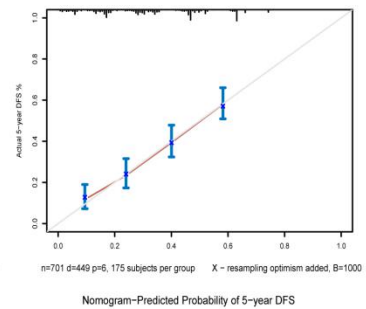

**Supplemental Figure 6** Model 2 for predicting DFS of HCC patients after hepatectomy. (A) Nomogram of the model. (B-D) Calibration curves for (B) 1 year, (C) 3 years and (D) 5 years DFS

**Note:** Model 2, prognostic model based on IBI

**Abbreviations:** IBI, Inflammation-immunity-nutrition score; MVI, microvascular invasion; AFP, alpha-fetoprotein; BCLC, Barcelona Clinic Liver Cancer; DFS, disease-free survival

A

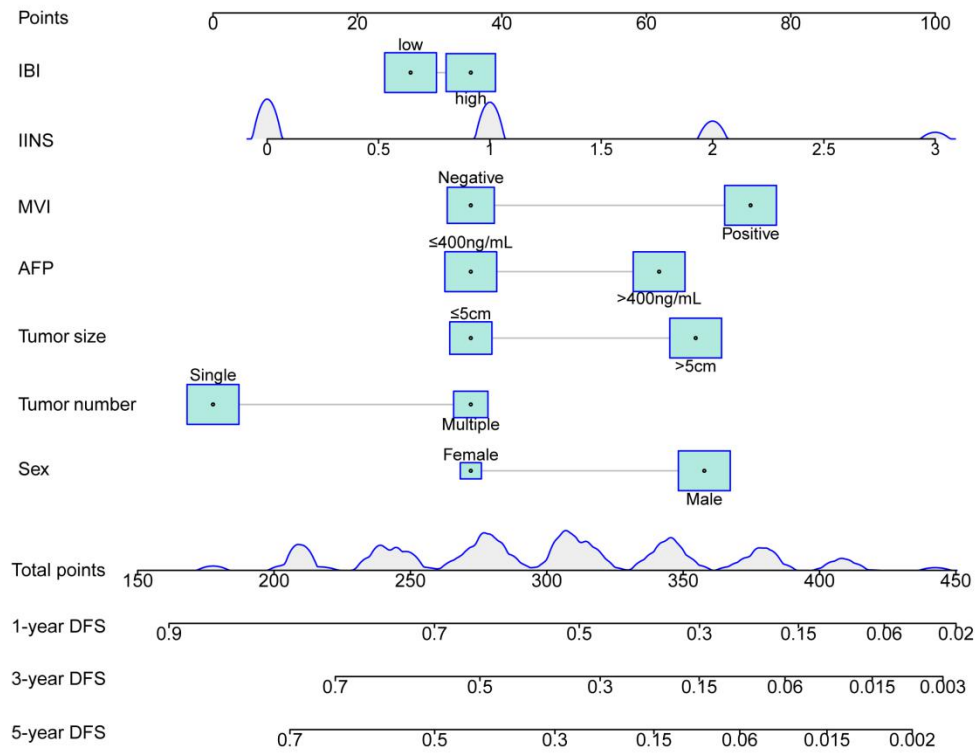

B

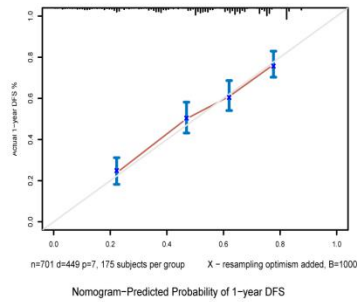

C

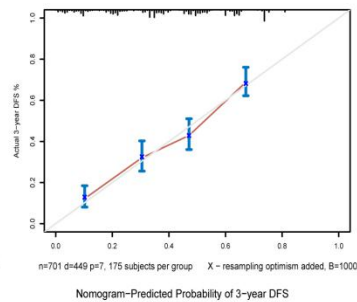

D

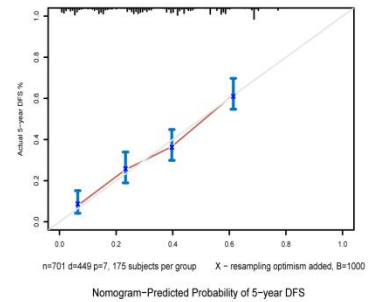

**Supplemental Figure 7** Model 3 for predicting DFS of HCC patients after hepatectomy. (A) Nomogram of the model. (B-D) Calibration curves for (B) 1 year, (C) 3 years and (D) 5 years DFS.

**Note:** Model 3, prognostic model based on IINS and IBI

**Abbreviations:** IBI, Inflammation-immunity-nutrition score; IINS Inflammation- immunity -nutrition score; MVI, microvascular invasion; AFP, alpha-fetoprotein; BCLC, Barcelona Clinic Liver Cancer; DFS, disease-free survival

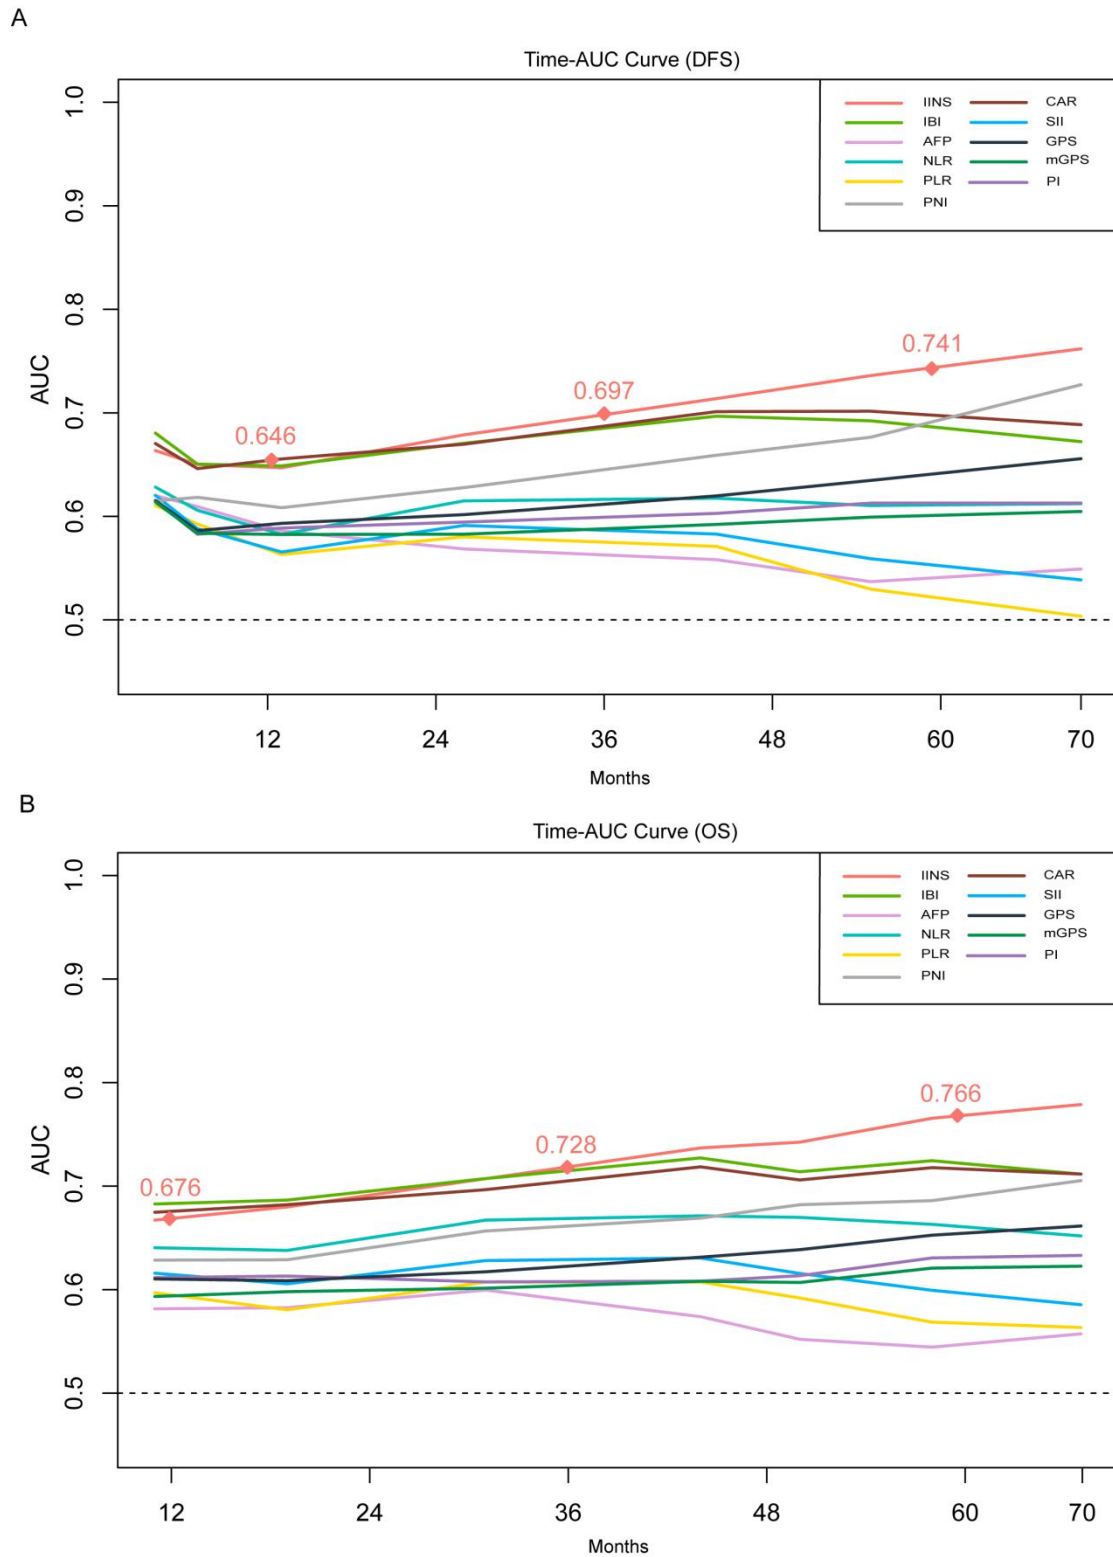

**Supplemental Figure 8** Time-dependent AUCs for predicting (A) DFS and (B) OS of inflammatory and nutritional indicators. The red nodes represent AUC values for 1 year, 3 years and 5 years respectively.

**Abbreviations:** AUCs area under the curves; IBI, Inflammation-immunity-nutrition score; IINS Inflammation-immunity-nutrition score; AFP, alpha-fetoprotein; NLR, neutrophil-to-lymphocyte ratio; CAR C-reactive protein/albumin ratio; PLR, platelet-lymphocyte ratio; PNI, prognostic nutritional index; PI, prognostic index; SII, systemic immune inflammation index; GPS, Glasgow Prognostic Score; mGPS, modified



Glasgow Prognostic Score; DFS, disease-free survival; OS, overall survival

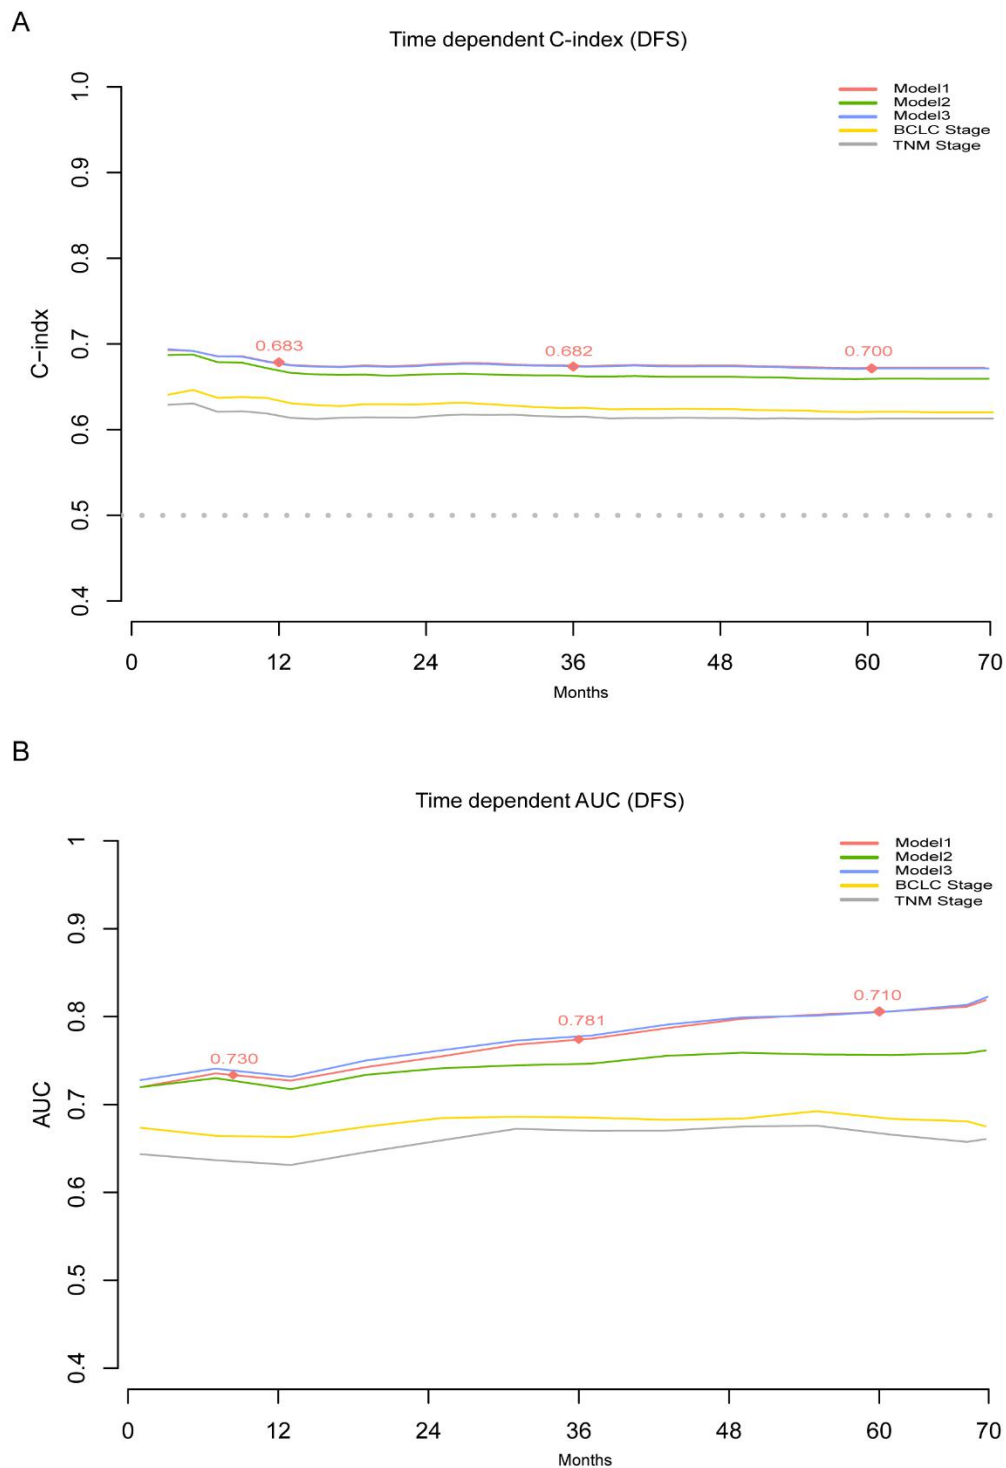

**Supplemental Figure 9** Comparison of models and traditional clinical staging systems for predicting prognosis. (A) Time-dependent C-index (B) Time-dependent AUCs. The red nodes represent C-index or AUC values of Model 1 for 1 year, 3 years and 5 years respectively.

**Note:** Model 1, prognostic model based on IINS; Model 2 prognostic model based on IBI;

Model 3, prognostic model based on IINS and IBI

**Abbreviations:** BCLC, Barcelona Clinic Liver Cancer; AJCC TNM, American Joint Committee on Cancer/Tumor-Node-Metastasis; AUC, area under the time-dependent receiver operating characteristic curve; IINS Inflammation-immunity-nutrition score; IBI, Inflammation-immunity-nutrition score; DFS, disease-free survival.

**Table S1 Inflammatory and nutritional indicator scores**

| Indicators                                                             | Score |
|------------------------------------------------------------------------|-------|
| PI                                                                     |       |
| CRP $\leq$ 10 mg/L and WBC count $\leq$ 10 $\times$ 10 <sup>9</sup> /L | 0     |
| CRP $\leq$ 10 mg/L and WBC count $>$ 10 $\times$ 10 <sup>9</sup> /L    | 1     |
| CRP $>$ 10 mg/L and WBC count $\leq$ 10 $\times$ 10 <sup>9</sup> /L    | 1     |
| CRP $>$ 10 mg/L and WBC count $>$ 10 $\times$ 10 <sup>9</sup> /L       | 2     |
| GPS                                                                    |       |
| CRP $\leq$ 10 mg/L and albumin $\geq$ 35 g/L                           | 0     |
| CRP $\leq$ 10 mg/L and albumin $<$ 35 g/L                              | 1     |
| CRP $>$ 10 mg/L and albumin $\geq$ 35 g/L                              | 1     |
| CRP $>$ 10 mg/L and albumin $<$ 35 g/L                                 | 2     |
| mGPS                                                                   |       |
| CRP $\leq$ 10 mg/L and albumin $\geq$ 35 g/L                           | 0     |
| CRP $\leq$ 10 mg/L and albumin $<$ 35 g/L                              | 0     |
| CRP $>$ 10 mg/L and albumin $\geq$ 35 g/L                              | 1     |
| CRP $>$ 10 mg/L and albumin $<$ 35 g/L                                 | 2     |

**Abbreviations:** PI, Prognostic Index; GPS, Glasgow Prognostic Score; mGPS Modified Glasgow Prognostic Score; CRP, C-reactive protein; WBC, white blood cell.

**Table S2 Comparison of inflammatory indicators prognostic efficacy for disease-free survival and overall survival**

| Variable | DFS    |             |        |             |        |             | OS     |             |        |             |        |             |
|----------|--------|-------------|--------|-------------|--------|-------------|--------|-------------|--------|-------------|--------|-------------|
|          | 1-year |             | 3-year |             | 5-year |             | 1-year |             | 3-year |             | 5-year |             |
|          | AUC    | 95CI%       |
| IINS     | 0.646  | 0.607-0.685 | 0.697  | 0.661-0.734 | 0.741  | 0.700-0.782 | 0.676  | 0.629-0.723 | 0.728  | 0.693-0.764 | 0.766  | 0.730-0.802 |
| IBI      | 0.650  | 0.608-0.691 | 0.684  | 0.644-0.726 | 0.682  | 0.629-0.735 | 0.691  | 0.643-0.739 | 0.725  | 0.687-0.763 | 0.727  | 0.684-0.769 |
| AFP      | 0.590  | 0.553-0.628 | 0.566  | 0.526-0.605 | 0.548  | 0.495-0.601 | 0.584  | 0.539-0.629 | 0.579  | 0.542-0.616 | 0.557  | 0.513-0.601 |
| NLR      | 0.586  | 0.542-0.629 | 0.629  | 0.586-0.671 | 0.613  | 0.560-0.667 | 0.638  | 0.584-0.688 | 0.668  | 0.628-0.709 | 0.663  | 0.518-0.592 |
| PLR      | 0.563  | 0.520-0.607 | 0.574  | 0.530-0.618 | 0.512  | 0.457-0.568 | 0.588  | 0.536-0.641 | 0.608  | 0.566-0.650 | 0.565  | 0.517-0.615 |
| CAR      | 0.655  | 0.613-0.696 | 0.683  | 0.642-0.725 | 0.690  | 0.637-0.743 | 0.686  | 0.638-0.735 | 0.716  | 0.678-0.755 | 0.719  | 0.676-0.762 |
| SII      | 0.566  | 0.523-0.610 | 0.592  | 0.548-0.635 | 0.546  | 0.489-0.602 | 0.615  | 0.563-0.667 | 0.629  | 0.587-0.671 | 0.600  | 0.552-0.648 |
| PNI      | 0.610  | 0.567-0.653 | 0.638  | 0.595-0.680 | 0.682  | 0.629-0.734 | 0.621  | 0.569-0.673 | 0.663  | 0.623-0.703 | 0.683  | 0.637-0.727 |
| PI       | 0.590  | 0.557-0.624 | 0.594  | 0.562-0.627 | 0.607  | 0.569-0.646 | 0.625  | 0.580-0.670 | 0.610  | 0.576-0.643 | 0.631  | 0.598-0.664 |
| GPS      | 0.592  | 0.557-0.628 | 0.608  | 0.574-0.643 | 0.630  | 0.590-0.670 | 0.618  | 0.571-0.664 | 0.626  | 0.591-0.661 | 0.651  | 0.616-0.686 |
| mGPS     | 0.585  | 0.553-0.617 | 0.584  | 0.553-0.614 | 0.592  | 0.557-0.628 | 0.608  | 0.564-0.653 | 0.606  | 0.574-0.638 | 0.619  | 0.588-0.650 |

**Abbreviations:** IINS, inflammation -immunity-nutrition score; IBI, Inflammatory burden index; AFP, alpha-fetoprotein; NLR, neutrophil-to-lymphocyte ratio; PLR, platelet- lymphocyte ratio; CAR, C-reactive protein/albumin ratio; SII, systemic immune inflammation index; PNI, prognostic nutritional index; PI, prognostic index; GPS, Glasgow Prognostic Score; mGPS, modified Glasgow Prognostic Score

**Table S3 Comparison of models with conventional clinical staging systems to predict disease-free survival and overall survival**

| Variable       | DFS     |       |         |       |         |       | OS      |       |         |       |         |       |
|----------------|---------|-------|---------|-------|---------|-------|---------|-------|---------|-------|---------|-------|
|                | 1-year  |       | 3-year  |       | 5-year  |       | 1-year  |       | 3-year  |       | 5-year  |       |
|                | C-index | AUC   |
| Model1         | 0.683   | 0.730 | 0.682   | 0.781 | 0.700   | 0.810 | 0.728   | 0.750 | 0.729   | 0.794 | 0.712   | 0.804 |
| Model2         | 0.675   | 0.720 | 0.670   | 0.754 | 0.666   | 0.767 | 0.723   | 0.745 | 0.700   | 0.748 | 0.682   | 0.725 |
| Model3         | 0.683   | 0.729 | 0.682   | 0.780 | 0.679   | 0.806 | 0.727   | 0.749 | 0.727   | 0.792 | 0.710   | 0.802 |
| BCLC Stage     | 0.639   | 0.666 | 0.631   | 0.685 | 0.625   | 0.688 | 0.662   | 0.678 | 0.657   | 0.699 | 0.646   | 0.703 |
| AJCC TNM (8th) | 0.618   | 0.635 | 0.617   | 0.670 | 0.615   | 0.671 | 0.627   | 0.635 | 0.618   | 0.649 | 0.611   | 0.634 |

**Note:** Model 1, prognostic model based on IINS; Model 2 prognostic model based on IBI; Model 3, prognostic model based on IINS and IBI

**Abbreviations:** IINS Inflammation-immunity-nutrition score; IBI, Inflammation-immunity-nutrition score; BCLC, Barcelona Clinic Liver Cancer; AJCC TNM, American Joint Committee on Cancer/Tumor-Node-Metastasis
